# Supplementary material for: Effect of Different Phospholipids on α-Secretase Activity in the Non-Amyloidogenic Pathway of Alzheimer’s Disease
Source: PubMed Central journal article supplement (PMC3634454; doi:10.3390/ijms14035879), 2013-03-13
Supplement: ijms-14-05879-s001.pdf [file ijms-14-05879-s001.pdf]

## Supplementary Information

**Figure S1.** Effect of PC18:0 on  $\alpha$ -secretase activity compared to the solvent control. Purified membranes of SH-SY5Y wt cells were incubated with 25  $\mu$ M PC18:0 or the solvent EtOH. PC18:0 showed no alterations in  $\alpha$ -secretase activity.

**Figure S1: effect of PC 18:0 vs ethanol solvent control**

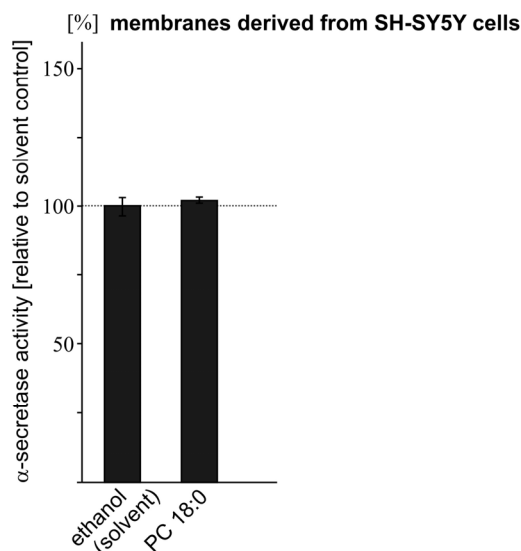

**Figure S2.** Ratio of phospholipid species in SH-SY5Y and human *post mortem* brain membranes. The ratio of the phospholipid species PC, PE and PS was determined by thin layer chromatography. The distribution of the three phospholipid species is represented below. PC is set to 100%. Both in SH-SY5Y cells and human brains PC is the major species followed by PE and PS. However, the distribution between PC:PE:PS is slightly different between the neuroblastoma cell lines and the membrane derived from human brains.

**Figure S2: distribution of headgroups in membranes derived from SH-SY5Y and human brains**

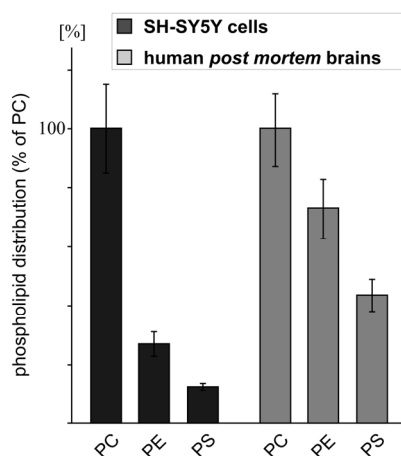

**Figure S3.** Representative kinetics for  $\alpha$ -secretase measurements. **(A)** PC18:0 versus solvent control ethanol. Determination of  $\alpha$ -secretase activity in the presence of PC18:0 (25  $\mu$ M) in purified membranes of SH-SY5Y cells. The  $\alpha$ -secretase activity was determined by a fluorometric assay; **(B)** PC10:0–PC18:0 *in vitro*. Determination of  $\alpha$ -secretase activity in the presence of PC10:0–PC18:0: Influence of the fatty acid chain length on  $\alpha$ -secretase activity in purified membranes of human SH-SY5Y cells. Purified membranes of SH-SY5Y cells were incubated with the phospholipids (25  $\mu$ M), PC18:0 served as control. The  $\alpha$ -secretase activity was determined by a fluorometric assay.  $\alpha$ -secretase activity was increased by PC10:0, PC12:0 and PC14:0 and not by PC16:0. Error bars represent SEM (Standard error of the mean); **(C)** PC18:0, PC20:4, PC20:5, PC22:6 *in vitro*. Determination of  $\alpha$ -secretase activity in the presence of PC18:0–PC22:6: Influence of the saturation grade on  $\alpha$ -secretase activity in purified membranes of human SH-SY5Y cells. Purified membranes of SH-SY5Y cells were incubated with the phospholipids (25  $\mu$ M), PC18:0 served as control.  $\alpha$ -secretase activity was determined by a fluorometric assay. The  $\alpha$ -secretase activity was increased by PC20:4 and PC22:6. The strongest effect can be seen for PC20:5. Error bars represent SEM (Standard error of the mean); **(D)** PC12:0–PC18:0 *in vivo*. Determination of  $\alpha$ -secretase activity in the presence of PC10:0–PC18:0: Influence of the fatty acid chain length on  $\alpha$ -secretase activity in human SH-SY5Y cells. SH-SY5Y cells were incubated with the phospholipids (10  $\mu$ M) for 8 + 16 h.  $\alpha$ -secretase activity was determined by a fluorometric live cell assay. The  $\alpha$ -secretase activity was increased by PC10:0, PC12:0 and PC14:0 and not by PC16:0. Error bars represent SEM (Standard error of the mean); **(E)** PC18:0, PC 20:4, PC20:5, PC22:6 *in vivo*. Determination of  $\alpha$ -secretase activity in the presence of PC18:0–PC22:6: Influence of the saturation grade on  $\alpha$ -secretase activity in human SH-SY5Y cells. SH-SY5Y cells were incubated with the phospholipids (10  $\mu$ M) for 8 + 16 h. The  $\alpha$ -secretase activity was determined by a fluorometric live cell assay. The  $\alpha$ -secretase activity was increased by all unsaturated PC species, PC18:2 and PC18:3 showed minor effects, the strongest effect can be seen for PC20:5 and PC22:6. Error bars represent SEM (Standard error of the mean); **(F)** Linear regression of the kinetics shown in E; **(G)** PC12:0, PC 18:0, purified ADAM10. Determination of ADAM10 activity in the presence of PC12:0 and PC18:0 (control): ADAM10 purified enzyme was treated with the phospholipids (25  $\mu$ M) in the presence of a human brain lipid environment. ADAM10 activity was determined by a fluorometric assay. PC12:0 showed a significant increase of activity compared to PC18:0. Error bars represent SEM (Standard error of the mean); **(H)** PC18:0, PC22:6, purified ADAM10. Determination of ADAM10 activity in the presence of unsaturated phospholipids PC18:3 and PC22:6, PC18:0 served as a control: ADAM10 purified enzyme was treated with the phospholipids (25  $\mu$ M) in the presence of a human brain lipid environment. ADAM10 activity was determined by a fluorometric assay. PC18:3 and PC22:6 showed significantly increased activity of ADAM10 compared to PC18:0. Error bars represent SEM (Standard error of the mean); **(I)** PC12:0, PC18:0, human *post mortem* brain. Influence on  $\alpha$ -secretase activity *ex vivo* in purified membranes of human *post mortem* brains. Purified brain membranes were incubated with PC12:0 and

the corresponding control PC18:0 (50  $\mu$ M). Afterwards,  $\alpha$ -secretase activity was measured by a fluorometric assay. PC12:0 increased  $\alpha$ -secretase activity significantly compared to PC18:0. Error bars represent SEM (Standard error of the mean); (J) PC18:0, PC22:6, human *post mortem* brains. Influence on  $\alpha$ -secretase activity *ex vivo* in purified membranes of human *post mortem* brains. Purified brain membranes were incubated with unsaturated phospholipids PC18:3 and PC22:6 and the corresponding control PC18:0 (50  $\mu$ M). Afterwards,  $\alpha$ -secretase activity was measured by a fluorometric assay. PC18:3 showed a moderate increase in the activity of  $\alpha$ -secretase, whereas PC22:6 significantly enhanced  $\alpha$ -secretase activity compared to PC18:0. Error bars represent SEM (Standard error of the mean).

**Figure S3: representative kinetics for  $\alpha$ -secretase measurements**

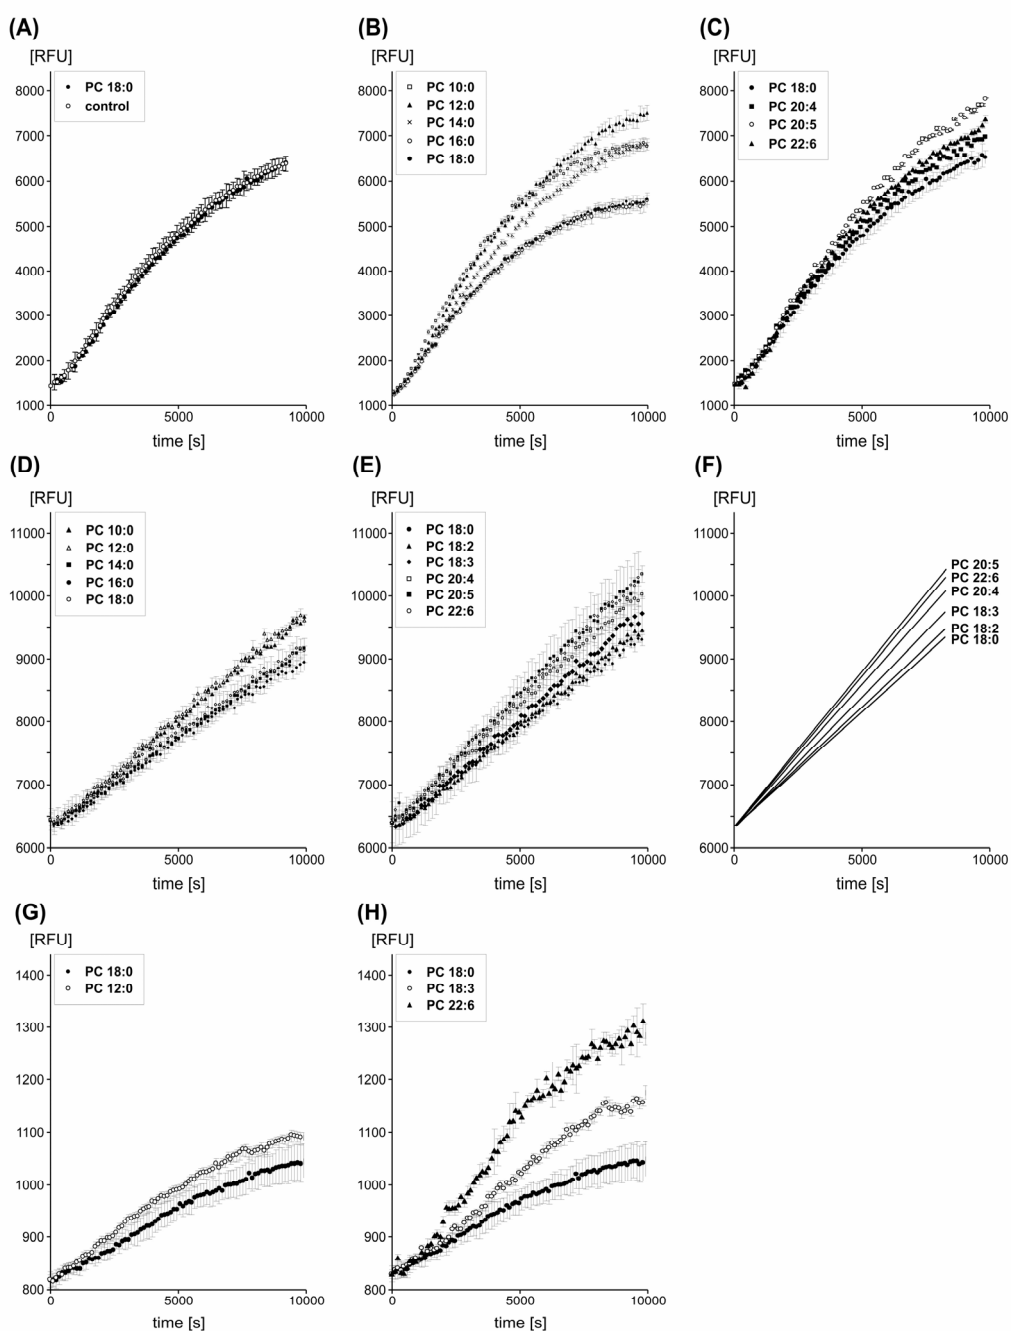

Figure S3. Cont.

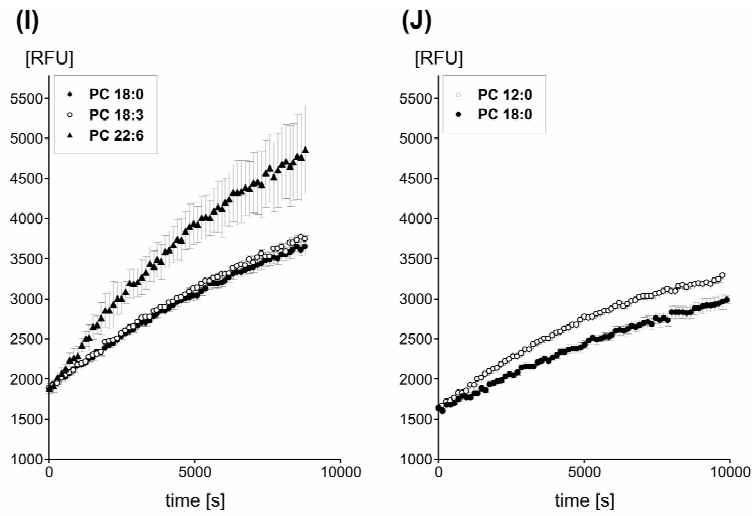

**Figure S4.** Specificity of  $\alpha$ -secretase activity assay. (A) Specificity of  $\alpha$ -secretase activity measurement was analyzed by adding the  $\alpha$ -secretase inhibitors GM6001 (100  $\mu$ M), Phenanthroline (1 mM) and EDTA/EGTA (1 mM) to purified membranes of SH-SY5Y cells; (B) For validation of the  $\alpha$ -secretase measurement on living SH-SY5Y cells, the sAPP $\alpha$  level was determined by the use of the antibody W02 as described in Ida *et al.*, 1996.

**Figure S4: Specificity of  $\alpha$ -secretase activity assay**

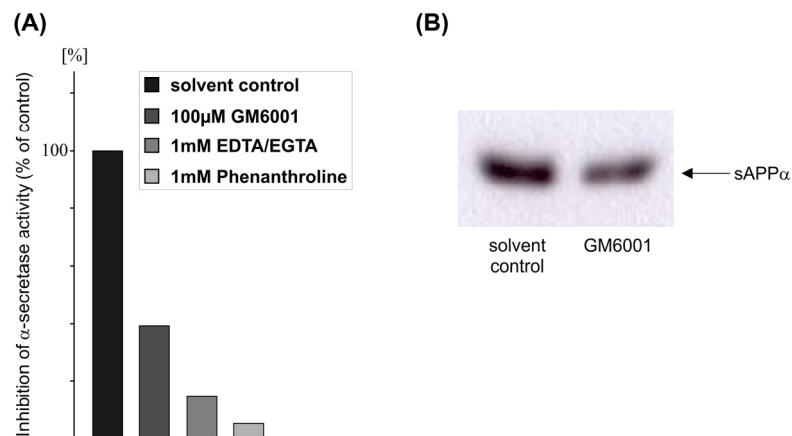

**Figure S5.** Phospholipid uptake into SH-SY5Y cells. SH-SY5Y cells were incubated with phospholipids **(A)** PC12:0 and **(B)** PC 18:0. Phospholipid uptake into SH-SY5Y cells was measured via mass spectrometry. Arrows represent specific signal for the incubated phospholipid. Additionally, the phospholipid incorporation into SH-SY5Y membranes was measured. cps (counts per second) for PC12:0 is 116,682.4 +/- 10,977.5, corresponding control is 133.8 +/- 9.9. PC18:0 is 116,111.3 +/- 8892.1 cps, the corresponding control is 2371.9 +/- 1668 cps.

**Figure S5: Phospholipid uptake into SH-SY5Y cells**

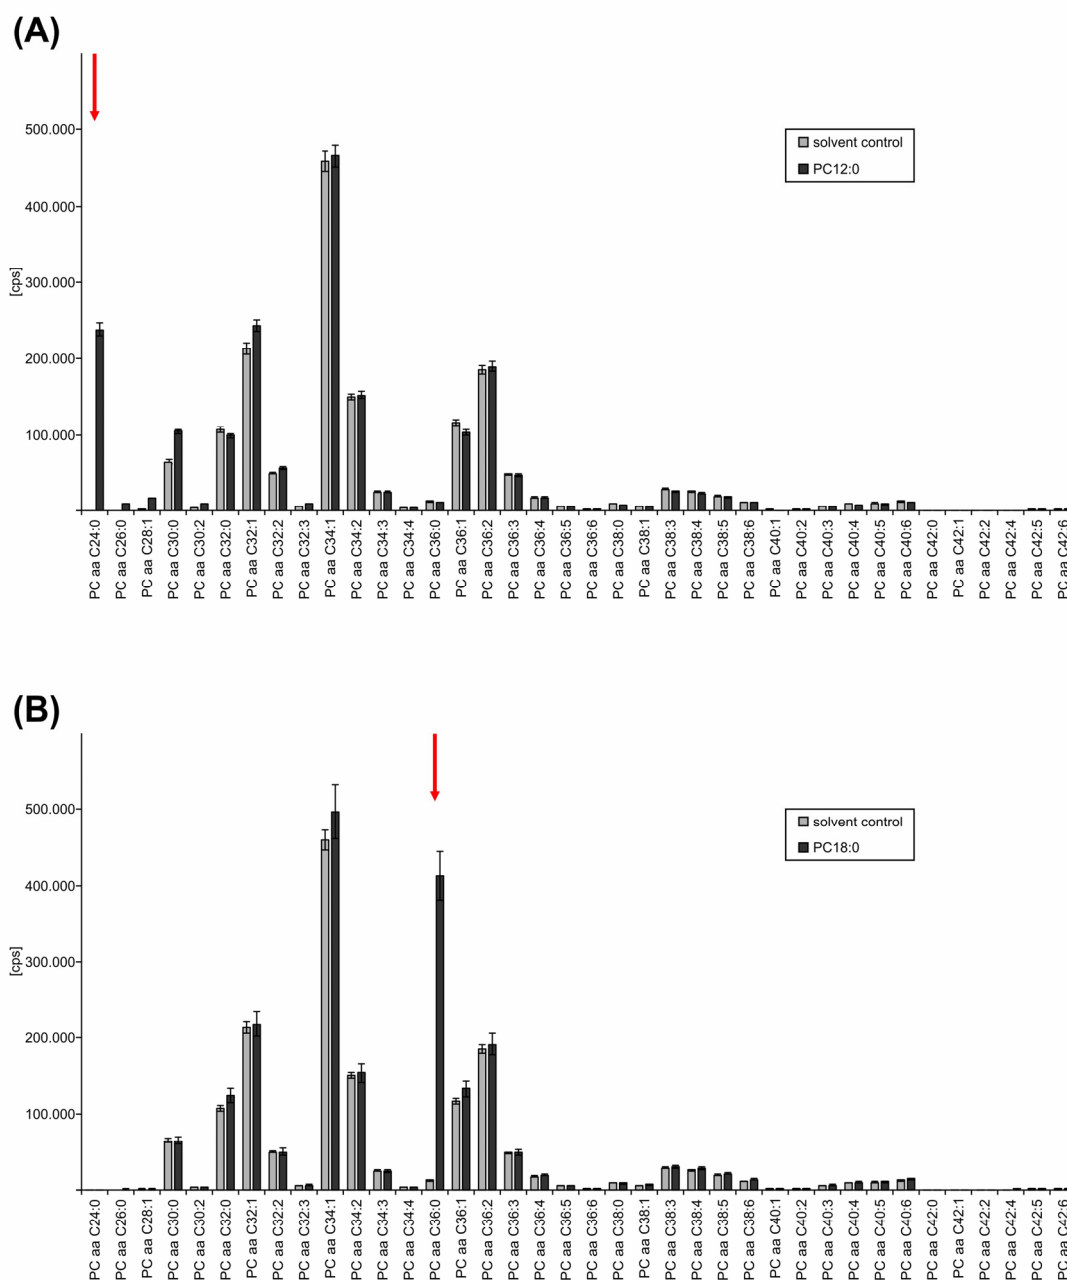

### Statistical Analysis of Phospholipid Species on $\alpha$ -Secretase Activity.

Statistical analysis was performed by ANOVA test for SH-SY5Y and human brain lipid environment. F values from analysis of variance and the corresponding p-values are shown. Two-tailed Student's *t*-test was performed for analysis of FA chain length in human brain lipid environment. *p*-values determined by *post hoc* test are listed below. Additionally, mean values and SEM for each phospholipid are displayed. Effect of phospholipid species were analyzed for each method alone (first two lanes) and, additionally, in a combined data set for SH-SY5Y membranes and living cells (last lanes) and a combined data set for human brain membranes and ADAM10 in human brain lipid environment. **(S1) Effect of FA chain length** Effect of chain length was analyzed for PC 10:0 to PC 24:0 in SH-SY5Y cells, and for PC18:0 and PC12:0 in human brain lipid environment. Statistical analysis of human brain lipid environment was performed here by Student's *t*-test. **(S2) Effect of phospholipid headgroup** The effect of the headgroup on  $\alpha$ -secretase activity was analyzed for PC / PE / PS 12:0 and 14:0 on SH-SY5Y cells and human brain lipid environment. **(S3) Effect of FA saturation** The effect of phospholipid saturation on  $\alpha$ -secretase activity was determined for PC18:0 to PC18:3, PC20:4, PC20:5 and PC22:6 in SH-SY5Y cells and PC18:0, PC18:3, PC22:6 in human brain lipid environment. **(S4) Effect of double-bond position** The effect of phospholipid double-bond position on  $\alpha$ -secretase activity was determined for PC18:1 $\Delta$ 9-cis and PC18:1 $\Delta$ 6 in SH-SY5Y cells.

**Table S1.** Effect of chain length.

|                               |                      |                                       |
|-------------------------------|----------------------|---------------------------------------|
| SH-SY5Y                       | membranes (a)        | ANOVA: F(7,16) = 8.77 , p < 0.001     |
|                               | living cells (b)     | ANOVA: F(7,76) = 32.00 , p < 0.001    |
|                               | combined data (a+b)  | ANOVA: F(7,92) = 33.13 , p < 0.001    |
| human brain lipid environment | membranes (c)        | ttest 2 tailed 12:0 vs 18:0 p = 0.004 |
|                               | purified ADAM 10 (d) | ttest 2 tailed 12:0 vs 18:0 p = 0.011 |
|                               | combined data (c+d)  | ttest 2 tailed 12:0 vs 18:0 p < 0.001 |

#### Mean & SEM%:

|         | SH-SY5Y membranes (a) |       | living SH-SY5Y cells (b) |      | combined data (a+b) |      |
|---------|-----------------------|-------|--------------------------|------|---------------------|------|
|         | Mean                  | SEM%  | Mean                     | SEM% | Mean                | SEM% |
| PC 10:0 | 127.71                | 2.23  | 124.75                   | 1.30 | 126.02              | 1.25 |
| PC 12:0 | 143.98                | 9.31  | 126.91                   | 1.28 | 129.92              | 2.38 |
| PC 14:0 | 127.99                | 11.92 | 103.52                   | 1.24 | 114.01              | 6.72 |
| PC 16:0 | 99.81                 | 5.91  | 99.20                    | 1.29 | 99.30               | 1.33 |
| PC 18:0 | 100.00                | 3.20  | 100.00                   | 2.29 | 100.00              | 1.98 |
| PC 20:0 | 102.32                | 0.53  | 98.81                    | 1.89 | 99.68               | 1.48 |
| PC 22:0 | 98.77                 | 1.90  | 100.08                   | 2.26 | 99.77               | 1.76 |
| PC 24:0 | 101.67                | 1.52  | 107.82                   | 2.18 | 106.40              | 1.84 |

Table S1. Cont.

|      | human brain lipid environment |      |                     |      |                     |      |
|------|-------------------------------|------|---------------------|------|---------------------|------|
|      | membranes (c)                 |      | purified ADAM10 (d) |      | combined data (c+d) |      |
|      | Mean                          | SEM% | Mean                | SEM% | Mean                | SEM% |
| 18:0 | 100.00                        | 5.69 | 100.00              | 6.40 | 100.00              | 4.99 |
| 12:0 | 141.86                        | 7.55 | 132.01              | 9.60 | 134.97              | 7.05 |

*Post-Hoc Test (p-values)*

|         |         | SH-SY5Y<br>membranes<br>(a) | living<br>SH-SY5Y cells<br>(b) | combined data<br>(a+b) |
|---------|---------|-----------------------------|--------------------------------|------------------------|
| PC 10:0 | PC 12.0 | 0.8761                      | 1.0000                         | 0.9996                 |
|         | PC 14.0 | 1.0000                      | <b>0.0005</b>                  | 0.0816                 |
|         | PC 16.0 | 0.1178                      | <b>0.0000</b>                  | <b>0.0000</b>          |
|         | PC 18.0 | 0.1233                      | <b>0.0000</b>                  | <b>0.0000</b>          |
|         | PC 20.0 | 0.2090                      | <b>0.0000</b>                  | <b>0.0000</b>          |
|         | PC 22.0 | 0.0920                      | <b>0.0000</b>                  | <b>0.0000</b>          |
|         | PC 24.0 | 0.1808                      | <b>0.0012</b>                  | <b>0.0000</b>          |
| PC 12:0 | PC 10.0 | 0.8761                      | 1.0000                         | 0.9996                 |
|         | PC 14.0 | 0.8918                      | <b>0.0000</b>                  | <b>0.0002</b>          |
|         | PC 16.0 | <b>0.0023</b>               | <b>0.0000</b>                  | <b>0.0000</b>          |
|         | PC 18.0 | <b>0.0024</b>               | <b>0.0000</b>                  | <b>0.0000</b>          |
|         | PC 20.0 | <b>0.0042</b>               | <b>0.0000</b>                  | <b>0.0000</b>          |
|         | PC 22.0 | <b>0.0018</b>               | <b>0.0000</b>                  | <b>0.0000</b>          |
|         | PC 24.0 | <b>0.0036</b>               | <b>0.0000</b>                  | <b>0.0000</b>          |
| PC 14:0 | PC 10.0 | 1.0000                      | <b>0.0005</b>                  | 0.0816                 |
|         | PC 12.0 | 0.8918                      | <b>0.0000</b>                  | <b>0.0002</b>          |
|         | PC 16.0 | 0.1104                      | 0.9996                         | <b>0.0005</b>          |
|         | PC 18.0 | 0.1155                      | 1.0000                         | <b>0.0011</b>          |
|         | PC 20.0 | 0.1966                      | 0.9995                         | <b>0.0027</b>          |
|         | PC 22.0 | 0.0861                      | 1.0000                         | <b>0.0024</b>          |
|         | PC 24.0 | 0.1698                      | 0.9999                         | 0.5795                 |
| PC 16:0 | PC 10.0 | 0.1178                      | <b>0.0000</b>                  | <b>0.0000</b>          |
|         | PC 12.0 | <b>0.0023</b>               | <b>0.0000</b>                  | <b>0.0000</b>          |
|         | PC 14.0 | 0.1104                      | 0.9996                         | <b>0.0005</b>          |
|         | PC 18.0 | 1.0000                      | 1.0000                         | 1.0000                 |
|         | PC 20.0 | 1.0000                      | 1.0000                         | 1.0000                 |
|         | PC 22.0 | 1.0000                      | 1.0000                         | 1.0000                 |
|         | PC 24.0 | 1.0000                      | <b>0.0479</b>                  | 0.2204                 |
| PC 18:0 | PC 10.0 | 0.1233                      | <b>0.0000</b>                  | <b>0.0000</b>          |
|         | PC 12.0 | <b>0.0024</b>               | <b>0.0000</b>                  | <b>0.0000</b>          |
|         | PC 14.0 | 0.1155                      | 1.0000                         | <b>0.0011</b>          |
|         | PC 16.0 | 1.0000                      | 1.0000                         | 1.0000                 |
|         | PC 20.0 | 1.0000                      | 1.0000                         | 1.0000                 |
|         | PC 22.0 | 1.0000                      | 1.0000                         | 1.0000                 |
|         | PC 24.0 | 1.0000                      | 0.1032                         | 0.3777                 |
| PC 20:0 | PC 10.0 | 0.2090                      | <b>0.0000</b>                  | <b>0.0000</b>          |
|         | PC 12.0 | <b>0.0042</b>               | <b>0.0000</b>                  | <b>0.0000</b>          |
|         | PC 14.0 | 0.1966                      | 0.9995                         | <b>0.0027</b>          |
|         | PC 16.0 | 1.0000                      | 1.0000                         | 1.0000                 |
|         | PC 18.0 | 1.0000                      | 1.0000                         | 1.0000                 |
|         | PC 22.0 | 1.0000                      | 1.0000                         | 1.0000                 |
|         | PC 24.0 | 1.0000                      | 0.1038                         | 0.5126                 |

**Table S1. Cont.**

|         |         | SH-SY5Y membranes (a) | living SH-SY5Y cells (b) | combined data (a+b) |
|---------|---------|-----------------------|--------------------------|---------------------|
| PC 22:0 | PC 10.0 | 0.0920                | <b>0.0000</b>            | <b>0.0000</b>       |
|         | PC 12.0 | <b>0.0018</b>         | <b>0.0000</b>            | <b>0.0000</b>       |
|         | PC 14.0 | 0.0861                | 1.0000                   | <b>0.0024</b>       |
|         | PC 16.0 | 1.0000                | 1.0000                   | 1.0000              |
|         | PC 18.0 | 1.0000                | 1.0000                   | 1.0000              |
|         | PC 20.0 | 1.0000                | 1.0000                   | 1.0000              |
|         | PC 24.0 | 1.0000                | 0.2539                   | 0.4985              |
| PC 24:0 | PC 10.0 | 0.1808                | <b>0.0012</b>            | <b>0.0000</b>       |
|         | PC 12.0 | <b>0.0036</b>         | <b>0.0000</b>            | <b>0.0000</b>       |
|         | PC 14.0 | 0.1698                | 0.9999                   | 0.5795              |
|         | PC 16.0 | 1.0000                | <b>0.0479</b>            | 0.2204              |
|         | PC 18.0 | 1.0000                | 0.1032                   | 0.3777              |
|         | PC 20.0 | 1.0000                | 0.1038                   | 0.5126              |
|         | PC 22.0 | 1.0000                | 0.2539                   | 0.4985              |

**Table S2. Effect of head group.**

|                                                |              |                                  |                                    |
|------------------------------------------------|--------------|----------------------------------|------------------------------------|
| SH-SY5Y                                        | membranes    | FA 12:0 (a1)                     | ANOVA: F(2,11) = 3,29 , p = 0.076  |
|                                                |              | FA 14:0 (a2)                     | ANOVA: F(2,11) = 15,93 , p < 0.001 |
|                                                |              | FA combined (a1&a2)              | ANOVA: F(2,25) < 1,0 , p = 0.787   |
|                                                | living cells | FA 12:0 (b1)                     | ANOVA: F(2,6) = 17.52 , p = 0.003  |
|                                                |              | FA 14:0 (b2)                     | ANOVA: F(2,6) = 2.49 , p = 0.163   |
|                                                |              | FA combined (b1&b2)              | ANOVA: F(2,15) = 4,25 , p = 0.035  |
| combined data membranes and living cells (a&b) |              | ANOVA: F(2,43) < 1,0 , p = 0.502 |                                    |
| human brain membranes                          | membranes    | FA 12:0 (c1)                     | ANOVA: F(2,14) = 1,37 , p = 0.286  |
|                                                |              | FA 14:0 (c2)                     | ANOVA: F(2,6) < 1,0 , p = 0.908    |
|                                                |              | FA combined (c1&c2)              | ANOVA: F(2,23) = 1,08 , p = 0.358  |

Mean & SEM%

|    | SH-SY5Y      |      |              |      |                     |      |
|----|--------------|------|--------------|------|---------------------|------|
|    | membranes    |      |              |      |                     |      |
|    | FA 12:0 (a1) |      | FA 14:0 (a2) |      | FA combined (a1&a2) |      |
|    | Mean         | SEM% | Mean         | SEM% | Mean                | SEM% |
| PC | 100.00       | 0.66 | 100.00       | 1.89 | 100.00              | 1.15 |
| PE | 98.48        | 1.28 | 100.95       | 1.54 | 99.71               | 1.02 |
| PS | 93.42        | 2.47 | 116.18       | 3.12 | 101.96              | 4.53 |

|    | SH-SY5Y      |      |              |      |                     |      | combined living cells and membranes (a+b) |      |
|----|--------------|------|--------------|------|---------------------|------|-------------------------------------------|------|
|    | living cells |      |              |      |                     |      |                                           |      |
|    | FA 12:0 (b1) |      | FA 14:0 (b2) |      | FA combined (b1&b2) |      |                                           |      |
|    | Mean         | SEM% | Mean         | SEM% | Mean                | SEM% | Mean                                      | SEM% |
| PC | 100.00       | 1.10 | 100.00       | 1.08 | 100.00              | 0.69 | 100.00                                    | 0.70 |
| PE | 93.63        | 2.75 | 104.99       | 4.04 | 99.31               | 3.35 | 99.58                                     | 1.25 |
| PS | 83.81        | 1.62 | 96.57        | 2.04 | 90.19               | 3.08 | 96.91                                     | 3.24 |



**Table S2. Cont.**

|    | human brain membranes |      |              |       |                     |      |
|----|-----------------------|------|--------------|-------|---------------------|------|
|    | FA 12:0 (c1)          |      | FA 14:0 (c2) |       | FA combined (c1&c2) |      |
|    | Mean                  | SEM% | Mean         | SEM%  | Mean                | SEM% |
| PC | 100.00                | 4.50 | 100.00       | 10.90 | 100.00              | 4.28 |
| PE | 109.24                | 3.05 | 105.68       | 3.55  | 107.91              | 2.26 |
| PS | 104.85                | 3.68 | 104.67       | 12.20 | 104.79              | 4.25 |

Post-Hoc Test (p-values)

|    |    | SH-SY5Y      |              |                     |              |              |                     |                                                |
|----|----|--------------|--------------|---------------------|--------------|--------------|---------------------|------------------------------------------------|
|    |    | membranes    |              |                     | living cells |              |                     | combined data membranes and living cells (a&b) |
|    |    | FA 12:0 (a1) | FA 14:0 (a2) | FA combined (a1&a2) | FA 12:0 (b1) | FA 14:0 (b2) | FA combined (b1&b2) |                                                |
| PC | PE | 0.935        | 0.978        | 1.000               | 0.170        | 0.555        | 0.997               | 0.998                                          |
|    | PS | 0.128        | <b>0.001</b> | 0.936               | <b>0.003</b> | 0.785        | 0.058               | 0.639                                          |
| PE | PC | 0.935        | 0.978        | 1.000               | 0.170        | 0.555        | 0.997               | 0.998                                          |
|    | PS | 0.169        | <b>0.001</b> | 0.883               | <b>0.035</b> | 0.191        | 0.082               | 0.698                                          |
| PS | PC | 0.128        | <b>0.001</b> | 0.936               | <b>0.003</b> | 0.785        | 0.058               | 0.639                                          |
|    | PE | 0.169        | <b>0.001</b> | 0.883               | <b>0.035</b> | 0.191        | 0.082               | 0.698                                          |

|    |    | human brain membranes |              |                     |
|----|----|-----------------------|--------------|---------------------|
|    |    | FA 12:0 (c1)          | FA 14:0 (c2) | FA combined (c1&c2) |
| PC | PE | 0.322                 | 0.971        | 0.410               |
|    | PS | 0.761                 | 0.983        | 0.756               |
| PE | PC | 0.322                 | 0.971        | 0.410               |
|    | PS | 0.831                 | 1.000        | 0.923               |
| PS | PC | 0.761                 | 0.983        | 0.756               |
|    | PE | 0.831                 | 1.000        | 0.923               |

**Table S3.** Effect of saturation.

|                               |                      |                                   |
|-------------------------------|----------------------|-----------------------------------|
| SH-SY5Y                       | membranes (a)        | ANOVA: F(6,23) = 4,95, p = 0.002  |
|                               | living cells (b)     | ANOVA: F(6,56) = 11,39, p < 0.001 |
|                               | combined data (a+b)  | ANOVA: F(6,79) = 9,77, p < 0.001  |
| human brain lipid environment | membranes (c)        | ANOVA: F(2,12) = 7,80, p = 0.007  |
|                               | purified ADAM 10 (d) | ANOVA: F(2,9) = 182,87, p < 0.001 |
|                               | combined data (c+d)  | ANOVA: F(2,24) = 18,41, p < 0.001 |

Mean & SEM%

|      | SH-SY5Y       |      |                  |       |                     |      |
|------|---------------|------|------------------|-------|---------------------|------|
|      | membranes (a) |      | living cells (b) |       | combined data (a+b) |      |
|      | Mean          | SEM% | Mean             | SEM%  | Mean                | SEM% |
| 18:0 | 100.00        | 1.17 | 100.00           | 2.29  | 100.00              | 1.77 |
| 18:1 | 101.96        | 1.54 | 110.32           | 4.33  | 108.04              | 3.33 |
| 18:2 | 97.11         | 2.10 | 115.00           | 6.60  | 110.12              | 5.36 |
| 18:3 | 98.18         | 1.99 | 117.40           | 2.31  | 112.15              | 3.20 |
| 20:4 | 104.21        | 4.78 | 124.70           | 1.97  | 117.87              | 3.49 |
| 20:5 | 123.08        | 7.63 | 140.05           | 14.18 | 132.51              | 8.23 |
| 22:6 | 108.56        | 2.63 | 136.82           | 2.22  | 123.52              | 3.89 |

|      | human brain lipid environment |       |                     |      |                     |       |
|------|-------------------------------|-------|---------------------|------|---------------------|-------|
|      | membranes (c)                 |       | purified ADAM10 (d) |      | combined data (c+d) |       |
|      | Mean                          | SEM%  | Mean                | SEM% | Mean                | SEM%  |
| 18:0 | 100.00                        | 3.08  | 100.00              | 4.76 | 100.00              | 2.63  |
| 18:3 | 106.28                        | 2.65  | 148.17              | 4.21 | 127.23              | 9.63  |
| 22:6 | 151.98                        | 17.40 | 229.70              | 2.72 | 181.13              | 17.64 |

*Post-Hoc Test (p-values)*

|      |      | SH-SY5Y       |                  |                     |
|------|------|---------------|------------------|---------------------|
|      |      | membranes (a) | living cells (b) | combined data (a+b) |
|      |      | 18:0          | 18:1             | 1.000               |
|      | 18:2 | 1.000         | 0.201            | 0.404               |
|      | 18:3 | 1.000         | 0.068            | 0.142               |
|      | 20:4 | 1.000         | <b>0.001</b>     | <b>0.002</b>        |
|      | 20:5 | <b>0.005</b>  | <b>0.000</b>     | <b>0.000</b>        |
|      | 22:6 | 0.791         | <b>0.000</b>     | <b>0.000</b>        |
| 18:1 | 18:0 | 1.000         | 0.802            | 0.791               |
|      | 18:2 | 1.000         | 1.000            | 1.000               |
|      | 18:3 | 1.000         | 0.999            | 1.000               |
|      | 20:4 | 1.000         | 0.516            | 0.674               |
|      | 20:5 | <b>0.042</b>  | <b>0.005</b>     | <b>0.000</b>        |
|      | 22:6 | 0.996         | <b>0.003</b>     | <b>0.026</b>        |
| 18:2 | 18:0 | 1.000         | 0.201            | 0.404               |
|      | 18:1 | 1.000         | 1.000            | 1.000               |
|      | 18:3 | 1.000         | 1.000            | 1.000               |
|      | 20:4 | 0.998         | 0.965            | 0.938               |
|      | 20:5 | <b>0.006</b>  | <b>0.033</b>     | <b>0.002</b>        |
|      | 22:6 | 0.615         | <b>0.026</b>     | 0.096               |

Table S3. Cont.

|      |      | SH-SY5Y       |                  |                     |
|------|------|---------------|------------------|---------------------|
|      |      | membranes (a) | living cells (b) | combined data (a+b) |
| 18:3 | 18:0 | 1.000         | 0.068            | 0.142               |
|      | 18:1 | 1.000         | 0.999            | 1.000               |
|      | 18:2 | 1.000         | 1.000            | 1.000               |
|      | 20:4 | 1.000         | 0.999            | 0.998               |
|      | 20:5 | <b>0.009</b>  | 0.080            | <b>0.006</b>        |
|      | 22:6 | 0.763         | 0.077            | 0.288               |
| 20:4 | 18:0 | 1.000         | <b>0.001</b>     | <b>0.002</b>        |
|      | 18:1 | 1.000         | 0.516            | 0.674               |
|      | 18:2 | 0.998         | 0.965            | 0.938               |
|      | 18:3 | 1.000         | 0.999            | 0.998               |
|      | 20:5 | 0.056         | 0.633            | 0.133               |
|      | 22:6 | 1.000         | 0.754            | 0.993               |
| 20:5 | 18:0 | <b>0.005</b>  | <b>0.000</b>     | <b>0.000</b>        |
|      | 18:1 | <b>0.042</b>  | <b>0.005</b>     | <b>0.000</b>        |
|      | 18:2 | <b>0.006</b>  | <b>0.033</b>     | <b>0.002</b>        |
|      | 18:3 | <b>0.009</b>  | 0.080            | <b>0.006</b>        |
|      | 20:4 | 0.056         | 0.633            | 0.133               |
|      | 22:6 | 0.131         | 1.000            | 0.790               |
| 22:6 | 18:0 | 0.791         | <b>0.000</b>     | <b>0.000</b>        |
|      | 18:1 | 0.996         | <b>0.003</b>     | <b>0.026</b>        |
|      | 18:2 | 0.615         | <b>0.026</b>     | 0.096               |
|      | 18:3 | 0.763         | 0.077            | 0.288               |
|      | 20:4 | 1.000         | 0.754            | 0.993               |
|      | 20:5 | 0.131         | 1.000            | 0.790               |

|      |      | human brain lipid environment |                      |                     |
|------|------|-------------------------------|----------------------|---------------------|
|      |      | membranes (c)                 | purified ADAM 10 (d) | combined data (c+d) |
| 18:0 | 18:3 | 0.974                         | <b>0.000</b>         | 0.212               |
|      | 22:6 | <b>0.007</b>                  | <b>0.000</b>         | <b>0.000</b>        |
| 18:3 | 18:0 | 0.974                         | <b>0.000</b>         | 0.212               |
|      | 22:6 | 0.058                         | <b>0.000</b>         | <b>0.008</b>        |
| 22:6 | 18:0 | <b>0.007</b>                  | <b>0.000</b>         | <b>0.000</b>        |
|      | 18:3 | 0.058                         | <b>0.000</b>         | <b>0.008</b>        |

**Table S4.** Effect of double bond position.

|         |              |                                                  |
|---------|--------------|--------------------------------------------------|
| SH-SY5Y | membranes    | ttest 2 tailed 18:1D9 (cis) vs 18:1D6, p = 0.041 |
|         | living cells | ttest 2 tailed 18:1D9 (cis) vs 18:1D6, p = 0.78  |

Mean &amp; SEM%:

|              | SH-SY5Y   |      |              |      |
|--------------|-----------|------|--------------|------|
|              | membranes |      | living cells |      |
|              | Mean      | SEM% | Mean         | SEM% |
| 18:1D9 (cis) | 100.00    | 1.76 | 100.00       | 4.40 |
| 18:1D6       | 106.08    | 0.96 | 101.65       | 4.45 |

**Table S5.** Lipid composition of membranes derived from human *post mortem* brain and SH-SY5Y cell membranes. The metabolites of the fatty acids are measured from lipid extracts of human brain and SH-SY5Y membranes. The metabolites are listed in the first lane, the Q1 and Q2 masses of the metabolites were detected by mass spectrometry. PC aa and PC ae represent both phospholipids, PC ae are plasmalogens. PC C 34:1 is set to 100%. The other phospholipid species are given in % to PC C 34:1.

PC Lipid composition of membranes derived from SH-SY5Y and human post mortem brains  
Samples were normalized to PC aa 34:1 and PCae 34:1

| Metabolite  | Q1 Mass (Da) | Q3 Mass (Da) | SH-SY5Y Mean% | human brain Mean% | SH-SY5Y SEM% | human brain SEM% |
|-------------|--------------|--------------|---------------|-------------------|--------------|------------------|
| PC aa C24:0 | 622.4        | 184          | 0.330         | 0.062             | 0.028        | 0.006            |
| PC aa C26:0 | 650.5        | 184          | 1.167         | 0.609             | 0.095        | 0.065            |
| PC aa C28:1 | 676.5        | 184          | 0.689         | 0.161             | 0.027        | 0.013            |
| PC aa C30:0 | 706.5        | 184          | 12.592        | 3.486             | 0.063        | 0.025            |
| PC aa C30:2 | 702.5        | 184          | 0.724         | 0.083             | 0.009        | 0.004            |
| PC aa C32:0 | 734.6        | 184          | 24.145        | 32.487            | 0.066        | 0.103            |
| PC aa C32:1 | 732.6        | 184          | 37.181        | 19.681            | 0.100        | 0.122            |
| PC aa C32:2 | 730.5        | 184          | 8.300         | 1.437             | 0.025        | 0.010            |
| PC aa C32:3 | 728.5        | 184          | 0.886         | 0.042             | 0.004        | 0.000            |
| PC aa C34:1 | 760.6        | 184          | 100.000       | 100.000           |              |                  |
| PC aa C34:2 | 758.6        | 184          | 26.674        | 5.550             | 0.078        | 0.023            |
| PC aa C34:3 | 756.6        | 184          | 3.762         | 0.324             | 0.012        | 0.004            |
| PC aa C34:4 | 754.5        | 184          | 0.411         | 0.098             | 0.008        | 0.002            |
| PC aa C36:0 | 790.6        | 184          | 2.635         | 2.896             | 0.010        | 0.007            |
| PC aa C36:1 | 788.6        | 184          | 27.707        | 29.832            | 0.057        | 0.107            |
| PC aa C36:2 | 786.6        | 184          | 36.188        | 13.058            | 0.138        | 0.045            |
| PC aa C36:3 | 784.6        | 184          | 8.385         | 3.885             | 0.041        | 0.018            |
| PC aa C36:4 | 782.6        | 184          | 2.340         | 8.794             | 0.010        | 0.022            |
| PC aa C36:5 | 780.6        | 184          | 0.803         | 0.329             | 0.066        | 0.004            |
| PC aa C36:6 | 778.5        | 184          | 0.264         | 0.103             | 0.017        | 0.003            |
| PC aa C38:0 | 818.7        | 184          | 1.311         | 0.349             | 0.005        | 0.003            |
| PC aa C38:1 | 816.7        | 184          | 1.308         | 3.031             | 0.005        | 0.027            |
| PC aa C38:3 | 812.6        | 184          | 5.881         | 2.817             | 0.016        | 0.021            |
| PC aa C38:4 | 810.6        | 184          | 4.328         | 9.055             | 0.023        | 0.037            |
| PC aa C38:5 | 808.6        | 184          | 2.940         | 3.979             | 0.149        | 0.050            |
| PC aa C38:6 | 806.6        | 184          | 1.575         | 5.285             | 0.042        | 0.026            |
| PC aa C40:1 | 844.7        | 184          | 0.285         | 0.387             | 0.005        | 0.003            |
| PC aa C40:2 | 842.7        | 184          | 0.475         | 1.446             | 0.001        | 0.012            |

Table S5. Cont.

| Metabolite  | Q1 Mass (Da) | Q3 Mass (Da) | SH-SY5Y<br>Mean% | human brain<br>Mean% | SH-SY5Y<br>SEM% | human brain<br>SEM% |
|-------------|--------------|--------------|------------------|----------------------|-----------------|---------------------|
| PC aa C40:3 | 840.7        | 184          | 1.333            | 0.365                | 0.006           | 0.003               |
| PC aa C40:4 | 838.6        | 184          | 1.845            | 1.120                | 0.010           | 0.006               |
| PC aa C40:5 | 836.6        | 184          | 1.562            | 1.235                | 0.038           | 0.017               |
| PC aa C40:6 | 834.6        | 184          | 1.772            | 3.195                | 0.054           | 0.013               |
| PC aa C42:0 | 874.7        | 184          | 0.172            | 0.088                | 0.009           | 0.001               |
| PC aa C42:1 | 872.7        | 184          | 0.143            | 0.339                | 0.003           | 0.003               |
| PC aa C42:2 | 870.7        | 184          | 0.104            | 0.388                | 0.002           | 0.005               |
| PC aa C42:4 | 866.7        | 184          | 0.192            | 0.125                | 0.002           | 0.001               |
| PC aa C42:5 | 864.7        | 184          | 0.214            | 0.094                | 0.004           | 0.002               |
| PC aa C42:6 | 862.6        | 184          | 0.334            | 0.182                | 0.007           | 0.010               |
| PC ae C30:0 | 692.6        | 184          | 5.950            | 2.271                | 0.055           | 0.038               |
| PC ae C30:1 | 690.5        | 184          | 1.780            | 1.351                | 0.043           | 0.085               |
| PC ae C30:2 | 688.5        | 184          | 0.298            | 0.404                | 0.023           | 0.036               |
| PC ae C32:1 | 718.6        | 184          | 25.050           | 10.680               | 0.100           | 0.089               |
| PC ae C32:2 | 716.6        | 184          | 4.337            | 0.979                | 0.013           | 0.034               |
| PC ae C34:0 | 748.6        | 184          | 22.981           | 32.355               | 0.169           | 0.209               |
| PC ae C34:1 | 746.6        | 184          | 100.000          | 100.000              |                 |                     |
| PC ae C34:2 | 744.6        | 184          | 21.120           | 5.621                | 0.121           | 0.084               |
| PC ae C34:3 | 742.6        | 184          | 3.339            | 0.835                | 0.021           | 0.038               |
| PC ae C36:0 | 776.7        | 184          | 3.969            | 8.509                | 0.085           | 0.066               |
| PC ae C36:1 | 774.6        | 184          | 22.747           | 50.795               | 0.090           | 0.210               |
| PC ae C36:2 | 772.6        | 184          | 30.646           | 21.567               | 0.145           | 0.111               |
| PC ae C36:3 | 770.6        | 184          | 16.933           | 3.142                | 0.127           | 0.046               |
| PC ae C36:4 | 768.6        | 184          | 6.152            | 5.826                | 0.015           | 0.047               |
| PC ae C36:5 | 766.6        | 184          | 1.213            | 1.045                | 0.047           | 0.020               |
| PC ae C38:0 | 804.7        | 184          | 1.953            | 5.212                | 0.032           | 0.046               |
| PC ae C38:1 | 802.7        | 184          | 4.478            | 18.418               | 0.039           | 0.221               |
| PC ae C38:2 | 800.7        | 184          | 8.199            | 13.103               | 0.043           | 0.067               |
| PC ae C38:3 | 798.6        | 184          | 14.828           | 3.914                | 0.050           | 0.051               |
| PC ae C38:4 | 796.6        | 184          | 12.293           | 8.464                | 0.066           | 0.097               |
| PC ae C38:5 | 794.6        | 184          | 10.873           | 5.829                | 0.116           | 0.034               |
| PC ae C38:6 | 792.6        | 184          | 6.059            | 3.867                | 0.038           | 0.044               |
| PC ae C40:0 | 832.7        | 184          | 5.060            | 24.187               | 0.065           | 0.126               |
| PC ae C40:1 | 830.7        | 184          | 3.664            | 19.827               | 0.269           | 0.397               |
| PC ae C40:2 | 828.7        | 184          | 1.781            | 35.134               | 0.016           | 0.364               |
| PC ae C40:3 | 826.7        | 184          | 4.683            | 3.419                | 0.026           | 0.040               |
| PC ae C40:4 | 824.7        | 184          | 7.047            | 3.920                | 0.033           | 0.046               |
| PC ae C40:5 | 822.6        | 184          | 5.952            | 3.069                | 0.033           | 0.037               |
| PC ae C40:6 | 820.6        | 184          | 6.329            | 3.586                | 0.050           | 0.062               |
| PC ae C42:0 | 860.8        | 184          | 1.019            | 3.461                | 0.035           | 0.052               |
| PC ae C42:1 | 858.7        | 184          | 0.732            | 3.417                | 0.021           | 0.065               |
| PC ae C42:2 | 856.7        | 184          | 0.616            | 3.967                | 0.020           | 0.097               |
| PC ae C42:3 | 854.7        | 184          | 0.749            | 3.121                | 0.027           | 0.045               |
| PC ae C42:4 | 852.7        | 184          | 0.812            | 0.701                | 0.007           | 0.014               |
| PC ae C42:5 | 850.7        | 184          | 0.848            | 0.829                | 0.007           | 0.032               |
| PC ae C44:3 | 882.7        | 184          | 0.416            | 1.058                | 0.039           | 0.021               |
| PC ae C44:4 | 880.7        | 184          | 0.259            | 0.876                | 0.009           | 0.037               |
| PC ae C44:5 | 878.7        | 184          | 0.244            | 1.692                | 0.008           | 0.033               |
| PC ae C44:6 | 876.7        | 184          | 0.337            | 0.806                | 0.006           | 0.036               |
